# Supplementary material for: Patient and Visit Characteristics Associated With Use of Direct Scheduling in Primary Care Practices
Source: PubMed Central journal article supplement (PMC7453311; doi:10.1001/jamanetworkopen.2020.9637), 2020-08-27
Supplement: jamanetwopen-3-e209637-s001.pdf [file jamanetwopen-3-e209637-s001.pdf]

## Supplementary Online Content

Ganguli I, Orav EJ, Lupo C, Metlay JP, Sequist TD. Patient and visit characteristics associated with use of direct scheduling in primary care practices. *JAMA Netw Open*. 2020;3(8):e209637. doi:10.1001/jamanetworkopen.2020.9637

### **eAppendix 1.** Prestudy Exploratory Survey

**eTable 1.** Survey of Primary Care Practice Leaders on Anticipated and Observed Outcomes of Direct Scheduling

**eTable 2.** Implementation Schedule

### **eAppendix 2.** Data Validation

**eFigure 1.** Direct Scheduling Adoption Rates Within Practices, by Time Since Adoption

**eFigure 2.** Distribution of Evaluation and Management Billing Codes Among Usually and Directly Scheduled Visits

**eTable 3.** Characteristics of Patient Portal Users Among Partners Healthcare Primary Care Patients in 2019

This supplementary material has been provided by the authors to give readers additional information about their work.

## **eAppendix 1. Prestudy Exploratory Survey**

To inform our analytic plan, we purposively sampled 30 clinical and administrative leaders at primary care practices that offered or were planning to offer direct scheduling in 2017-2018. We administered a mixed mode (online and paper) survey instrument to capture how practices used or planned to use direct scheduling. This 15-item survey included questions on existing processes to book appointments, pre-implementation preparation, patient outreach approaches, implementation strategies, and anticipated and observed effects of the program.

**eTable 1.** Survey of Primary Care Practice Leaders on Anticipated and Observed Outcomes of Direct Scheduling

| Potential outcomes                                    | Anticipated,<br>N=30 (%) | Observed,<br>N=30 (%) |
|-------------------------------------------------------|--------------------------|-----------------------|
| Patients schedule unnecessary visits                  | 12 (40)                  | 0 (0)                 |
| Patients schedule too many visits at a time           | 6 (20)                   | 0 (0)                 |
| Lower rates of no-shows and last-minute cancellations | 17 (57)                  | 2 (7)                 |
| Decreased front desk workload                         | 20 (67)                  | 1 (3)                 |
| Improved patient convenience                          | 17 (57)                  | 1 (3)                 |

**eTable 2.** Implementation Schedule

| Go-live year, month |           | Practice                                                                                |
|---------------------|-----------|-----------------------------------------------------------------------------------------|
| 2016                | October   | MGH Back Bay HealthCare Center                                                          |
| 2017                | May       | Mass General West Medical Group, Ambulatory Practice of the Future, MGH Downtown        |
|                     | June      | MGH Beacon Hill Primary Care, MGH Everett Family Care                                   |
|                     | September | Massachusetts General Medical Group, Bulfinch Medical Group                             |
|                     | October   | Primary Care Associates, Revere HealthCare Center (2), Broadway Primary Care - Revere   |
|                     | December  | Women's Health Associates                                                               |
| 2018                | January   | Chelsea HealthCare Center (2), Charlestown HealthCare Center, Primary Care Assembly Row |

## **eAppendix 2. Data Validation**

We used the EPIC “PCP” assignment field to determine a patient’s primary care physician. This field is used for a host of operational purposes (e.g., to notify the PCP of an emergency department visit, to forward specialist consultation notes, and to attribute quality improvement metrics and bonuses). It is updated regularly to reflect the patient’s, physician’s, and primary care office’s understanding of the patient’s true PCP.

Patient medical record numbers (MRNs) were matched to EPIC Patient IDs based on all available patient identifiers. We eliminated 3 MRNs and 5 visits for which we could not reliably match MRN to unique patient (match probability <100%). We eliminated 6727 visits that were scheduled before a given practice had adopted direct scheduling and 3,473 patients who no longer met our inclusion criteria as a result of these eliminations.

**eFigure 1.** Direct Scheduling Adoption Rates Within Practices, by Time Since Adoption

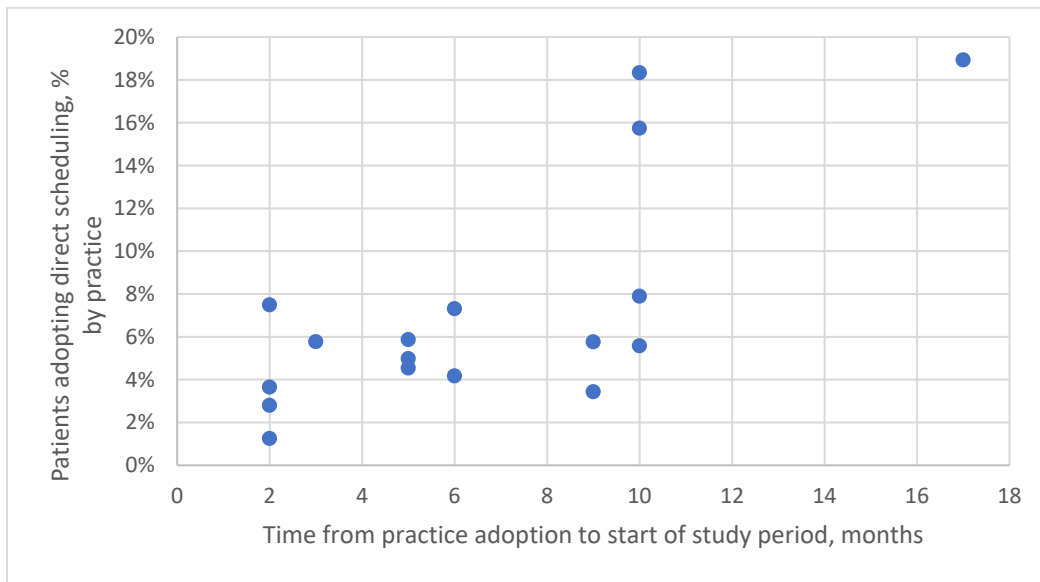

Each dot in this figure represents one of the 17 primary care practices in the study.

**eFigure 2.** Distribution of Evaluation and Management Billing Codes Among Usually and Directly Scheduled Visits

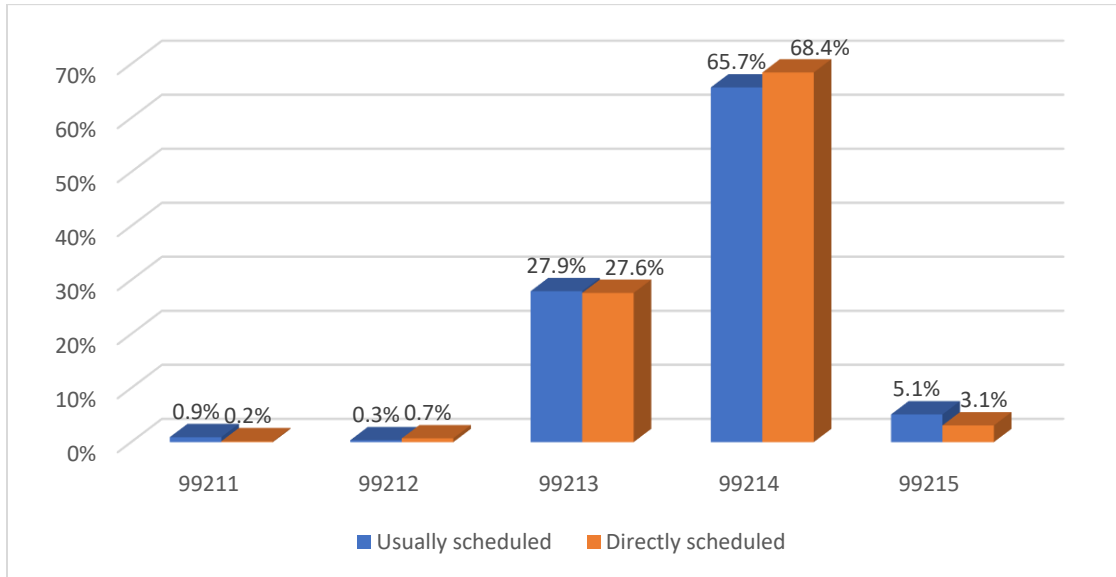

E&M = evaluation and management. Higher billing codes represent longer or more complex visits. For this analysis, we examined the 79,674 (62%) of 128,694 usually scheduled visits and 2,585 (47%) of 5531 directly scheduled visits that were billed as 99211-5.

**eTable 3.** Characteristics of Patient Portal Users Among Partners Healthcare Primary Care Patients in 2019

| Characteristic   |          | Portal users<br>N=465,005 (%) | Non-portal users<br>N=459,010 (%) |
|------------------|----------|-------------------------------|-----------------------------------|
| Female           |          | 278,037 (59.8)                | 239,117 (52.1)                    |
| Primary language | English  | 447,719 (96.3)                | 390,372 (85.0)                    |
|                  | Spanish  | 4,013 (0.9)                   | 34,626 (7.5)                      |
|                  | Other    | 13,273 (2.9)                  | 34,012 (7.4)                      |
| Race             | White    | 380,614 (81.9)                | 324,507 (70.7)                    |
|                  | Black    | 16,972 (3.6)                  | 30,368 (6.6)                      |
|                  | Asian    | 26,891 (5.8)                  | 18,104 (3.9)                      |
|                  | Hispanic | 4,002 (0.9)                   | 11,194 (2.4)                      |
|                  | Other    | 36,526 (7.9)                  | 74,837 (16.3)                     |
